# Supplementary material
Source: Springer Nature journal article supplement (https://www.springermedizin.de/resource/supplementary/12874_2012_831_MOESM2_ESM.pdf/9432752)

Difference in Electronically-Monitored  
and Self-Reported Adherence

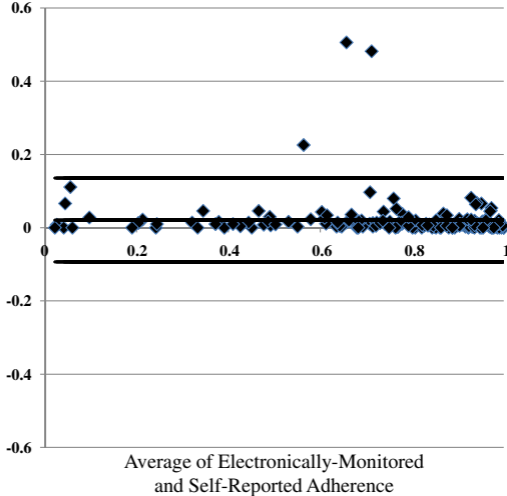

Supplement: MOESM2 [file 9432752]
